# Supplementary material for: Oxidative Balance Score during Pregnancy Is Associated with Oxidative Stress in the CANDLE Study
Source: MDPI journal article supplement (doi:10.3390/nu14112327), 2022-06-01
Supplement: s1 [file s1]

**Table S1: 111 Food Frequency Food items placed within 39 food Groups.**

| <b>Food groups</b>               | <b>Food items</b>                                                                                                                                              |
|----------------------------------|----------------------------------------------------------------------------------------------------------------------------------------------------------------|
| Red meat                         | Beef, pork, ribs, veal, meat loaf, and hamburger (cheeseburger), meatballs, meat sandwiches                                                                    |
| Processed meat                   | Breakfast sausage, chorizo, Polish sausage, Italian sausage, bacon, hot dogs, and lunch meats                                                                  |
| Organ meat                       | Liver, pig feet, neck bones and menudo                                                                                                                         |
| Poultry                          | Roasted chicken or turkey                                                                                                                                      |
| Mixed meat                       | Tacos, burritos, enchiladas, tamales, other mixed beef and chicken dishes                                                                                      |
| Fish and other seafood           | Oysters, shellfish, tuna (salad, casserole, etc.) and other fish                                                                                               |
| Fried chicken and fish           | Fried chicken, chicken nuggets, wings, patties and fried fish or fish sandwich                                                                                 |
| Egg                              | Breakfast egg sandwiches and other eggs                                                                                                                        |
| Dairy                            | Milk, milk on cereal, yogurt, cheese, ice cream, and Slim Fast                                                                                                 |
| Sugar-sweetened beverages        | Hi-C, drinks with some juice, Kool-Aid or lemonade or sports drinks like Gatorade or fruit flavored drinks (not including iced teas), and soft drink, Iced Tea |
| Fruit juices                     | Real orange juice, tomato juice or V-8, apple, grape, pineapple juice, or fruit smoothies                                                                      |
| Alcohol                          | Beer and liquor                                                                                                                                                |
| Wine                             | Wine                                                                                                                                                           |
| Coffee                           | Coffee                                                                                                                                                         |
| Water                            | Water                                                                                                                                                          |
| Other fruit                      | Bananas, apples or pears, peaches, cantaloupes, watermelons, and other fresh fruits                                                                            |
| Citrus fruits                    | Oranges, tangerines, grapefruits, strawberries                                                                                                                 |
| Canned fruit                     | Canned fruit                                                                                                                                                   |
| Tomatoes                         | Tomatoes and tomato or V-8 juice                                                                                                                               |
| Yellow vegetables                | Carrots and sweet potato                                                                                                                                       |
| Cruciferious vegetable           | Broccoli, coleslaw, spinach, greens                                                                                                                            |
| Potatoes                         | Potatoes (not fried), mashed, boiled, baked, or potato salad                                                                                                   |
| French fries                     | French fries                                                                                                                                                   |
| Other vegetables                 | Corn, green beans, vegetable stew, vegetable soup, and other vegetables                                                                                        |
| Legumes                          | Refried beans, bean, lentil or split pea soup, and other beans                                                                                                 |
| Tofu and meat substitutes        | Tofu and meat substitutes                                                                                                                                      |
| Mayonnaise, margarine and butter | Margarine, butter and mayonnaise                                                                                                                               |
| Salad dressing                   | salad dressing                                                                                                                                                 |
| Condiments                       | Jelly, catsup, and mustard                                                                                                                                     |
| Whole grains                     | Cooked cereal such as grits, oatmeal or cream of wheat                                                                                                         |
| Cold breakfast cereal            | Cold cereal                                                                                                                                                    |
| Bread products                   | Pancakes, biscuits, croissants, rolls, bagels, tortillas (flour), corn bread or muffins, hush puppies, white, whole wheat or dark, bread                       |
| Pizza                            | Pizza                                                                                                                                                          |
| Rice, pasta, mixed and dishes    | Spaghetti with meat sauce, macaroni and cheese, rice, other soup, and other noodles                                                                            |
| Nuts                             | Nuts, seeds and peanut butter                                                                                                                                  |

|                     |                                                                 |
|---------------------|-----------------------------------------------------------------|
| Sweets and desserts | Donuts, cakes, cookies, pumpkin pie, other pie, and other candy |
| Snacks              | Power bars, breakfast bars, chips, and crackers                 |
| Teas                | Hot teas                                                        |
| Chocolates          | Chocolate syrup or sauce, chocolate candy                       |

---

**Table S2: Selection of pro- and antioxidants for developing the oxidative balance score (OBS).**

| Variable                                           | Role       | Use in Previous OBS Research | Rationale for the inclusion of some components in a priori OBS in relation to oxidative stress.                                                                                                                                                                                                                                                                                                                                                                                      |
|----------------------------------------------------|------------|------------------------------|--------------------------------------------------------------------------------------------------------------------------------------------------------------------------------------------------------------------------------------------------------------------------------------------------------------------------------------------------------------------------------------------------------------------------------------------------------------------------------------|
| <b>Variables from Food Frequency Questionnaire</b> |            |                              |                                                                                                                                                                                                                                                                                                                                                                                                                                                                                      |
| Food energy                                        | Confounder | Yes                          | Used to adjust nutrient and reported intake                                                                                                                                                                                                                                                                                                                                                                                                                                          |
| Alpha-carotene                                     | Anti       | Yes                          | Deactivators of singlet oxygen and lipid peroxidation                                                                                                                                                                                                                                                                                                                                                                                                                                |
| Beta-carotene                                      | Anti       | Yes                          | Generation of free radical at high oxygen concentration                                                                                                                                                                                                                                                                                                                                                                                                                              |
| Cryptoxanthin, beta                                | Anti       | Yes                          | Synergistic antioxidants in biological membranes                                                                                                                                                                                                                                                                                                                                                                                                                                     |
| Lutein-Zeaxanthin                                  | Anti       | Yes                          | Inhibiting lipid peroxidation                                                                                                                                                                                                                                                                                                                                                                                                                                                        |
| Lycopene                                           | Anti       | Yes                          | Activation transcription factors of antioxidant enzymes                                                                                                                                                                                                                                                                                                                                                                                                                              |
| Retinol                                            |            |                              | Induce the expression of genes encoders for the synthesis of some of the antioxidant enzymes <sup>1</sup>                                                                                                                                                                                                                                                                                                                                                                            |
| Alcohol (ethanol)                                  | Pro        | Yes                          | Possible increase in ROS generation and increase of inflammatory processes<br>Induction of OS by oxidation of ethanol to acetaldehyde, which can lead to the production of ROS and RNS, oxidation of nucleic acids and decrease in the activity of antioxidant enzymes. <sup>33</sup>                                                                                                                                                                                                |
| Total dietary fat                                  | Pro        | Yes                          | Intake of lipids can contribute to oxidative stress through lipid peroxidation <sup>1</sup>                                                                                                                                                                                                                                                                                                                                                                                          |
| Saturated fat                                      | Pro        |                              | Oxidative DNA damage <sup>1</sup>                                                                                                                                                                                                                                                                                                                                                                                                                                                    |
| Avg. daily omega-3 fatty acids+ supplements        | Anti       | Yes                          | N-3-PUFAs are involved in antioxidant activity <sup>1</sup>                                                                                                                                                                                                                                                                                                                                                                                                                          |
| Avg. daily omega-6 fatty acids + supplements       | Pro        | Yes                          | Fatty acids n-6 are pro-inflammatory <sup>1</sup>                                                                                                                                                                                                                                                                                                                                                                                                                                    |
| Dietary fiber                                      | Anti       | Yes                          | Transported of antioxidants through the intestines and influences the redox through microbiota <sup>2</sup>                                                                                                                                                                                                                                                                                                                                                                          |
| Vitamin E as alpha-tocopherol + supplements        | Anti       | Yes                          | Fatty acids present in lipoproteins, biological membranes, and tissues, through the elimination of free radicals such as the radical peroxide<br>Protection of the cell membrane, as well as of various subcellular membranes, against the effects of lipid peroxidation<br>Inhibition of lipid peroxidation in biological membranes<br>Protection against the oxidation of LDL-cholesterol<br>Prevention against risk factors or diseases initiated or promoted by ROS <sup>1</sup> |
| Caffeine                                           | Anti       | Yes                          | Binds copper and Iron to prevent oxidation <sup>16</sup>                                                                                                                                                                                                                                                                                                                                                                                                                             |
| Copper + supplements                               | Anti       |                              | Metabolic role in reduction of oxidative stress <sup>8 10</sup>                                                                                                                                                                                                                                                                                                                                                                                                                      |

|                                                                              |      |                                                                                                                |                                                                                                                                                                                                                                            |
|------------------------------------------------------------------------------|------|----------------------------------------------------------------------------------------------------------------|--------------------------------------------------------------------------------------------------------------------------------------------------------------------------------------------------------------------------------------------|
| Iron+ supplements                                                            | Pro  | Yes                                                                                                            | Oxidative DNA damage <sup>1</sup>                                                                                                                                                                                                          |
| Magnesium + supplements                                                      | Anti |                                                                                                                | Required for glutathione production <sup>7</sup>                                                                                                                                                                                           |
| Selenium + supplements                                                       | Anti | Yes                                                                                                            | Oxidative DNA damage <sup>1</sup>                                                                                                                                                                                                          |
| Zinc, total + supplements                                                    | Anti | Yes                                                                                                            | Cofactors of enzymes involved in the endogenous antioxidant system that interrupt cellular oxidative processes <sup>1</sup>                                                                                                                |
| Glutathione, total                                                           | Anti | Yes                                                                                                            | Prevention of the formation of free radicals, metal chelators <sup>17</sup>                                                                                                                                                                |
| Total Flavonoid                                                              | Anti | Sum from the list of Flavonoids below.*                                                                        | Inhibition of expression, synthesis or activity of pro-oxidant enzymes<br>Induce the expression of genes encoders for the synthesis of some of the antioxidant enzymes <sup>1</sup>                                                        |
| Vitamin C + supplements                                                      | Anti | Yes                                                                                                            | Antioxidant that scavenges ROS and RNS<br>Prevention of lipid peroxidation<br>Regeneration of $\alpha$ -tocopherol <sup>11</sup>                                                                                                           |
| Niacin+ supplements                                                          | Anti |                                                                                                                | Acts as a hydride ion acceptor or donor in many biological redox reactions. <sup>4</sup>                                                                                                                                                   |
| Riboflavin (Vitamin B2) + supplements                                        | Anti |                                                                                                                | A coenzyme in numerous redox reactions <sup>6</sup>                                                                                                                                                                                        |
| Average daily Dietary Folate Equivalents + supplements                       | Anti | Yes                                                                                                            | Improve the endogenous antioxidant system. Also, folic acid increases the ratio of reduced/oxidized glutathione (GSH/GSSG) and reduces protein nitration <sup>12</sup>                                                                     |
| Vitamin D + supplements                                                      | Anti | Yes                                                                                                            | Vitamin D passes through the expression of the erythroid-derived 2 nuclear factor Nfr2, which under ROS production activates the expression of antioxidant enzymes.<br>Cofactor in redox modulation of NADPH and Glutathione <sup>13</sup> |
| Vitamin K as phyloquinone + supplements                                      | Anti |                                                                                                                |                                                                                                                                                                                                                                            |
| HEI-2010 component 12, SoFAAS Cals (Solid Fat, Excess Alcohol & Added Sugars | Pro  | No                                                                                                             | Composite score that integrates saturated, fat, alcohol and added sugars, all known to be pro antioxidants                                                                                                                                 |
| Red meat                                                                     | Pro  | Yes                                                                                                            | Possible intensification of oxidative stress mediated by iron intake contained in red meat <sup>1</sup>                                                                                                                                    |
| <i>Brassica</i> vegetables (Greens, cabbage, broccoli, spinach)              | Anti | Add the highlighted together as a total estimate of Cruciferous or <i>Brassica</i> vegetables vegetable intake | Attempt to distinguish higher intake of vegetables with phytochemicals compared to higher vegetable intake <sup>9,34</sup>                                                                                                                 |
| Smoking Status                                                               | pro  |                                                                                                                | Exogenous prooxidant: increased oxidative stress and oxidative imbalance in cellular                                                                                                                                                       |

tissues The increase of the OS load of inhaled tobacco smoke could increase through the secondary release of oxygen radicals from the inflammatory cells Increase in markers of oxidative stress in blood and tissues <sup>1</sup>

#### Medication/Lifestyle Choices from 2<sup>nd</sup> trimester of pregnancy

|           |      |     |
|-----------|------|-----|
| NSAID Use | Anti | Yes |
|-----------|------|-----|

Regulation of ROS and RNS to reduce inflammation and cell damage<sup>1</sup>

|     |     |     |
|-----|-----|-----|
| BMI | Pro | Yes |
|-----|-----|-----|

Related to increased ROS markers Leads to redox imbalance and increased lipid peroxidation, which can lead to ROS production <sup>35</sup>

#### Biomarkers from 2<sup>nd</sup> trimester of pregnancy

|           |      |    |
|-----------|------|----|
| Vitamin D | Anti | No |
|-----------|------|----|

Vitamin D passes through the expression of the erythroid-derived 2 nuclear factor Nfr2, which under ROS production activates the expression of antioxidant enzymes. <sup>1</sup>.

|               |      |    |
|---------------|------|----|
| Plasma Folate | Anti | No |
|---------------|------|----|

Improves the endogenous antioxidant system. Also, folic acid increases the ratio of reduced/oxidized glutathione (GSH/GSSG) and reduces protein nitration <sup>12</sup>.

---

**Table S3: Socioeconomic characteristics of the study population.**

| <b>Characteristic</b>                        | <b>Full CANDLE Cohort<br/>N=1503<br/>mean (SD)/N (%)</b> | <b>Eligible Study Sample<br/>N=1322<br/>mean (SD)/N (%)</b> | <b>P value</b> |
|----------------------------------------------|----------------------------------------------------------|-------------------------------------------------------------|----------------|
| <b>Maternal age, y</b>                       | 26.0 (5.4)                                               | 26.3 (5.4)                                                  | 0.2101         |
| <b>Maternal race</b>                         |                                                          |                                                             |                |
| Black                                        | 990 (65.9%)                                              | 847 (64.1%)                                                 | 0.3127         |
| <b>Maternal education</b>                    |                                                          |                                                             |                |
| High school diploma or GED or less           | 893 (59.2%)                                              | 761 (57.6)                                                  | 0.8842         |
| <b>Pre-pregnancy BMI status</b>              |                                                          |                                                             |                |
| Overweight/Obese                             | 799 (53.3%)                                              | 701 (53.2%)                                                 | 0.9048         |
| <b>Maternal marital status</b>               |                                                          |                                                             |                |
| Cohabitation                                 | 848 (56.4%)                                              | 777 (58.8%)                                                 | 0.2206         |
| <b>Health insurance status</b>               |                                                          |                                                             |                |
| Public                                       | 901 (60.0%)                                              | 755 (57.1%)                                                 | 0.1364         |
| <b>Adjusted household income<sup>1</sup></b> |                                                          |                                                             |                |
| ≥\$40k                                       | 201 (14.7%)                                              | 183 (15.1%)                                                 | 0.8196         |
| <b>Prenatal alcohol use (yes)</b>            | 121 (8.1%)                                               | 115 (8.7%)                                                  | 0.5795         |
| <b>Prenatal tobacco use (yes)</b>            | 151 (10.1%)                                              | 132 (10.0%)                                                 | 1.0000         |
| <b>Plasma 25(OH)D, ng/mL</b>                 | 21.7 (8.5)                                               | 22.3 (8.6)                                                  | 0.0670         |
| <b>Plasma Folate, ng/mL</b>                  | 23.6 (12.9)                                              | 23.8 (12.9)                                                 | 0.6565         |

<sup>1</sup>Adjusted for size of household.

**Table S4: Food Items from Food Frequency Questionnaire associated with Oxidative Balance Score (R<sup>2</sup>=0.82).**

| <b>Food Items</b>         | <b>Food Group</b>          | <b>Beta<sup>1</sup></b> |
|---------------------------|----------------------------|-------------------------|
| Liver                     | Organ meats                | 1.08                    |
| Oysters                   | Fish and other seafood     | 0.76                    |
| Tofu                      | Tofu and meat substitutes  | 0.65                    |
| Spinach                   | Cruciferous vegetable      | 0.49                    |
| Carrots                   | Yellow vegetables          | 0.39                    |
| Sweet potato              | Yellow vegetables          | 0.31                    |
| Shellfish                 | Fish and other seafood     | 0.29                    |
| Hot tea                   | Teas                       | 0.23                    |
| Green salad               | Salad dressing             | 0.21                    |
| Power bars                | Snacks                     | 0.20                    |
| Spaghetti with meat sauce | Rice, pasta, mixed, dishes | 0.19                    |
| Broccoli                  | Cuciferious vegetable      | 0.17                    |
| Slimfast                  | Dairy                      | 0.17                    |
| Coffee                    | Coffee                     | 0.16                    |
| Vegetable stew            | Other vegetables           | 0.14                    |
| Other vegetables          | Other vegetables           | 0.11                    |
| Beef                      | Red meat                   | 0.10                    |
| Other fresh fruit         | Other fruit                | 0.09                    |
| Tomato juice              | Tomatoes                   | 0.09                    |
| Real orange juice         | Fruit juices               | 0.08                    |
| Milk on cereal            | Dairy                      | 0.07                    |
| Strawberries, in season   | Citrus fruits              | 0.07                    |
| Nuts                      | Nuts                       | 0.07                    |
| Breakfast bars            | Snacks                     | 0.06                    |
| Ice tea                   | Teas                       | 0.05                    |
| Milk (default 2%)         | Dairy                      | 0.05                    |
| Meat substitutes          | Tofu and meat substitutes  | 0.04                    |
| Other potatoes            | Potatoes                   | 0.04                    |
| Bagels, English muffins   | Bread products             | 0.04                    |
| Cold cereal               | Cold breakfast cereal      | 0.04                    |
| Bean soup                 | Legumes                    | 0.04                    |
| Other noodles             | Rice, pasta, mixed, dishes | 0.04                    |
| Yogurt                    | Dairy                      | 0.04                    |
| Oranges or tangerines     | Citrus fruits              | 0.03                    |
| Tacos                     | Mixed meat                 | 0.03                    |
| Greens                    | Cruciferous vegetable      | 0.03                    |
| Vegetable soup            | Other vegetables           | 0.03                    |
| Watermelon, in season     | Other fruit                | 0.02                    |
| Pork                      | Red meat                   | 0.02                    |
| Water                     | Water                      | 0.02                    |
| Bananas                   | Other fruit                | 0.02                    |
| Other beans               | Legumes                    | 0.02                    |
| Apples or pears           | Other fruit                | 0.01                    |
| Catsup                    | Condiments                 | 0.01                    |

|                          |                                  |        |
|--------------------------|----------------------------------|--------|
| Cooked Cereal            | Whole grains                     | 0.01   |
| Other soup               | Rice, pasta, mixed, dishes       | 0.01   |
| Chocolate syrup          | Chocolate                        | 0.01   |
| Other fish               | Fish and other seafood           | 0.01   |
| Canned fruit             | Canned fruit                     | 0.01   |
| Peaches, raw             | Other fruit                      | 0.01   |
| White bread              | Bread products                   | 0.01   |
| Other real juice         | Fruit juices                     | 0.004  |
| Peanut butter            | Nuts                             | 0.003  |
| Lunch Meats              | Processed meat                   | 0.002  |
| Hi C                     | Sugar-sweetened beverages        | 0.0006 |
| Crackers                 | Snacks                           | -0.001 |
| Burger rolls             | Bread products                   | -0.004 |
| Salad dressing           | Salad dressing                   | -0.005 |
| Hamburger (cheeseburger) | Red meat                         | -0.01  |
| Cookies                  | Sweets and desserts              | -0.01  |
| Pumpkin Pie              | Sweets and desserts              | -0.01  |
| Bacon                    | Processed meat                   | -0.011 |
| Butter                   | Mayonnaise, margarine and butter | -0.014 |
| Sodas                    | Sugar-sweetened beverages        | -0.01  |
| Chocolate candy          | Chocolate                        | -0.01  |
| Cheese                   | Dairy                            | -0.01  |
| Other eggs               | Egg                              | -0.02  |
| Biscuits                 | Bread products                   | -0.02  |
| Corn bread               | Bread products                   | -0.02  |
| Rice                     | Rice, pasta, mixed, dishes       | -0.02  |
| Margarine                | Mayonnaise, margarine and butter | -0.02  |
| Cake                     | Sweets and desserts              | -0.02  |
| Pancakes                 | Bread products                   | -0.02  |
| Mayonnaise               | Mayonnaise, margarine and butter | -0.02  |
| Kool aid                 | Sugar-sweetened beverages        | -0.02  |
| Other beef dish          | Mixed meat                       | -0.03  |
| Donuts                   | Sweets and desserts              | -0.03  |
| Fried fish               | Fried chicken and fish           | -0.03  |
| Pizza                    | Pizza                            | -0.03  |
| French Fries             | French fries                     | -0.03  |
| Chips                    | Snacks                           | -0.04  |
| Ice cream                | Dairy                            | -0.04  |
| Fried chicken            | Fried chicken and fish           | -0.04  |
| Mac N Cheese             | Rice, pasta, mixed, dishes       | -0.05  |
| Cole slaw                | Cruciferous vegetable            | -0.07  |
| Breakfast sausage        | Processed meat                   | -0.07  |
| Other pie                | Sweets and desserts              | -0.08  |
| Hot dogs                 | Processed meat                   | -0.09  |
| Breakfast egg sandwich   | Egg                              | -0.13  |
| Ribs                     | Red meat                         | -0.35  |
| Liquor                   | Alcohol                          | -7.31  |
